# Supplementary material for: Metabolomics Method in Understanding and Sensitizing Carbapenem-Resistant Acinetobacter baumannii to Meropenem
Source: PubMed Central journal article supplement — ACS Infect Dis. 2023 Nov 22;10(1):184–95. doi: 10.1021/acsinfecdis.3c00480 (PMC10788854; doi:10.1021/acsinfecdis.3c00480), 2023-11-22
Supplement: id3c00480_si_001.pdf [file id3c00480_si_001.pdf]

## Supporting Information

### Metabolomics method in understanding and sensitizing carbapenem-resistant *Acinetobacter baumannii* to meropenem

Xia Li <sup>a#</sup>, Dingyun Feng <sup>a#</sup>, Jianxia Zhou <sup>a#</sup>, Wenbin Wu <sup>a</sup>, Wenzheng Zheng <sup>a</sup>, Wenlei Gan<sup>a</sup>,  
Ming Jiang <sup>c</sup>, Hui Li<sup>b</sup>, Xuanxian Peng<sup>b</sup>, Tiantuo Zhang <sup>a,\*</sup>

<sup>a</sup> Department of Pulmonary and Critical Care Medicine, The Third Affiliated Hospital of Sun Yat-sen University, Institute of Respiratory Diseases of Sun Yat-sen University, Guangzhou 510630, People's Republic of China

<sup>b</sup>School of Life Sciences, Sun Yat-sen University, Guangzhou 510275, People's Republic of China

<sup>c</sup> Institute of Animal Science, Guangdong Academy of Agricultural Sciences, Guangzhou 510640, People's Republic of China

<sup>#</sup>These authors contributed equally

\*Corresponding author: [zhtituli@163.com](mailto:zhtituli@163.com)

#### Table of contents

|                                                                                                                         |    |
|-------------------------------------------------------------------------------------------------------------------------|----|
| Figure S1. Growth curves of the bacteria.....                                                                           | S2 |
| Figure S2. Metabolic profile of clinically isolated CSAB and CRAB.....                                                  | S3 |
| Figure S3. The synergistic bactericidal effect of AMP or ATP with meropenem to 10 additional CRAB strains.....          | S4 |
| Table S1. MIC ranges for susceptible, intermediate, and resistant <i>A. baumannii</i> strains to other antibiotics..... | S5 |
| Table S2. <i>A. baumannii</i> strains used in the experiment.....                                                       | S6 |
| Table S3. Primers for qPCR.....                                                                                         | S7 |

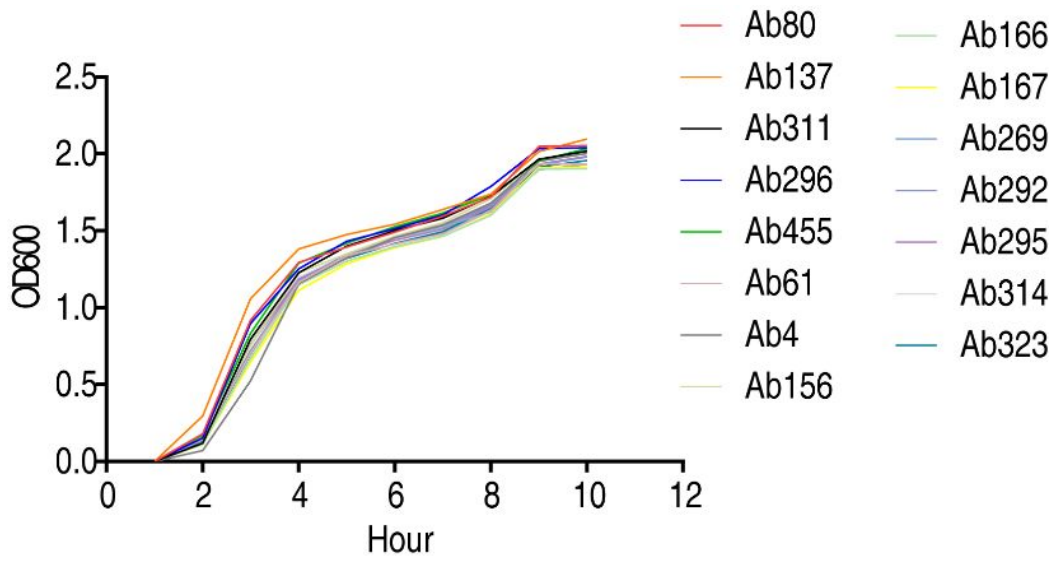

**Figure S1. Growth curves of the bacteria**

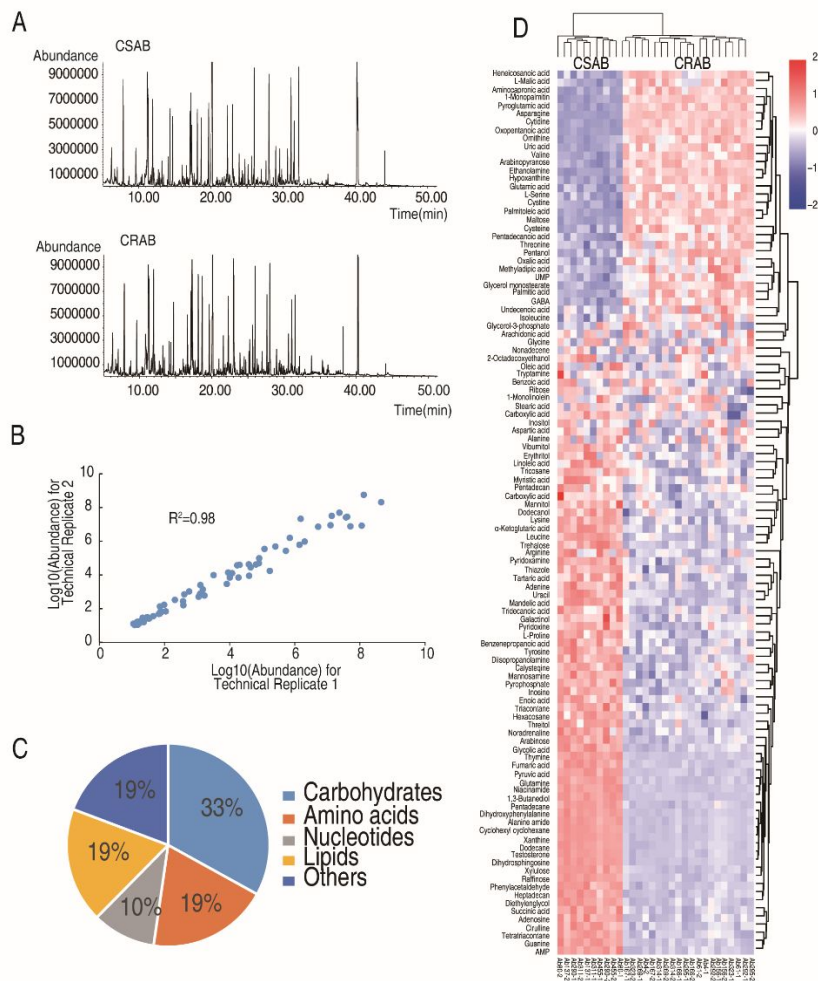

**Figure S2. Metabolic profile of clinically isolated CSAB and CRAB.**

(A) The ion chromatogram of total metabolites.

(B) Correlation coefficient between technical replicates.

(C) Categories of the metabolites identified in clinically isolated *A. baumannii*.

(D) Heat map of the 109 identified metabolites (row), blue and red colors represent low to high abundance (see color scale).

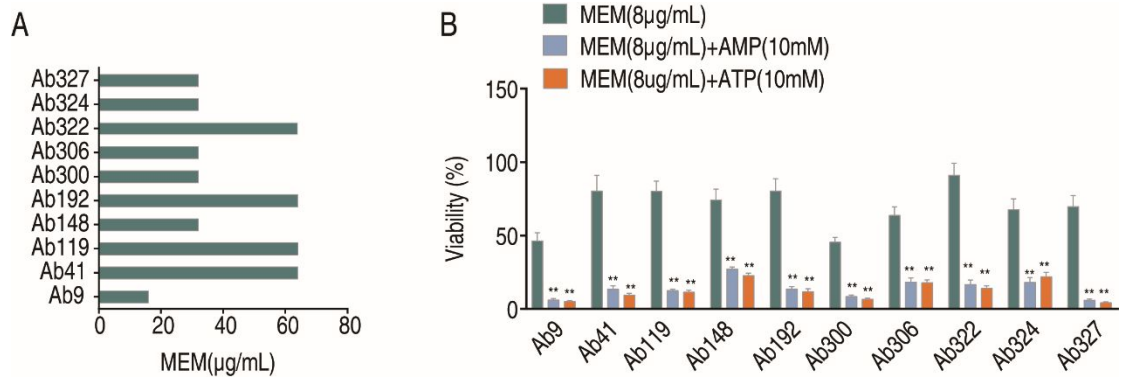

**Figure S3. The synergistic bactericidal effect of AMP or ATP with meropenem to 10 additional CRAB strains.**

(A) MIC of the additional 10 strains of clinically isolated CRAB to meropenem.

(B) Viability of the additional 10 strains of CRAB after treatment with meropenem plus AMP or ATP.

**Table S1. MIC ranges for susceptible, intermediate, and resistant *A. baumannii* strains to other antibiotics (µg/mL)**

| Strains | Classification | AK     | GEN    | TOB    | IPM  | CIP    | LEV    | TZP    | CTX  | CRO  | SXT      | SAM    | PB | TE   | DO  | MH  | TIC  |
|---------|----------------|--------|--------|--------|------|--------|--------|--------|------|------|----------|--------|----|------|-----|-----|------|
| Ab4     | XDR            | > 1024 | > 1024 | > 1024 | 32   | 128    | 16     | 128/32 | 512  | 512  | 32/608   | 128/64 | 16 | 512  | 512 | 2   | 1    |
| Ab61    | XDR            | > 1024 | > 1024 | > 1024 | 64   | 512    | 32     | 128/32 | 1024 | 1024 | 32/608   | 128/64 | 2  | 1024 | 512 | 8   | 2    |
| Ab156   | XDR            | > 1024 | > 1024 | > 1024 | 64   | 128    | 32     | 128/32 | 1024 | 1024 | > 32/608 | 64/32  | 2  | 512  | 32  | 4   | 1    |
| Ab166   | XDR            | > 1024 | > 1024 | > 1024 | 64   | 512    | 32     | 128/32 | 1024 | 1024 | > 32/608 | 64/32  | 8  | 1024 | 16  | 16  | 2    |
| Ab167   | XDR            | > 1024 | > 1024 | > 1024 | 64   | 512    | 32     | 128/32 | 1024 | 1024 | > 32/608 | 64/32  | 2  | 1024 | 16  | 32  | 1    |
| Ab269   | XDR            | > 1024 | > 1024 | > 1024 | 128  | 1024   | 32     | 128/32 | 512  | 1024 | > 32/608 | 64/32  | 2  | 512  | 32  | 8   | 1    |
| Ab292   | XDR            | > 1024 | > 1024 | > 1024 | 32   | 1024   | 16     | 128/32 | 512  | 512  | > 32/608 | 64/32  | 2  | 1024 | 16  | 8   | 2    |
| Ab295   | XDR            | > 1024 | > 1024 | > 1024 | 64   | > 1024 | 64     | 256/64 | 1024 | 1024 | > 32/608 | 64/32  | 2  | 512  | 32  | 4   | 1    |
| Ab314   | XDR            | > 1024 | > 1024 | > 1024 | 64   | 1024   | 32     | 256/64 | 512  | 512  | > 32/608 | 128/64 | 1  | 512  | 32  | 8   | 1    |
| Ab323   | XDR            | > 1024 | > 1024 | > 1024 | 128  | 1024   | 64     | 256/64 | 1024 | 1024 | > 32/608 | 64/32  | 16 | 1024 | 16  | 16  | 2    |
| Ab80    | NOT MDR        | 16     | 4      | 32     | 0.5  | 0.5    | 0.5    | 16/4   | 32   | 4    | 0.5/19   | 4/2    | 2  | 4    | 0.5 | 2   | 0.25 |
| Ab137   | NOT MDR        | 4      | 4      | 1      | 0.25 | 0.25   | 0.125  | 2/0.5  | 4    | 0.5  | 0.5/19   | 2/1    | 2  | 2    | 0.5 | 1   | 0.25 |
| Ab296   | CSAB           | 8      | 4      | 32     | 0.5  | 0.125  | 0.0625 | 8/2    | 16   | 4    | 0.25/9.5 | 1/0.5  | 1  | 0.5  | 0.5 | 0.5 | 0.5  |
| Ab311   | NOT MDR        | 4      | 4      | 16     | 0.5  | 0.25   | 0.125  | 16/4   | 8    | 4    | 0.5/19   | 2/1    | 1  | 0.5  | 0.5 | 1   | 0.5  |
| Ab455   | MDR            | 16     | 8      | 8      | 0.25 | 1      | 0.25   | 8/2    | 8    | 32   | 16/304   | 2/1    | 2  | 32   | 2   | 0.1 | 0.5  |

AK: Amikacin, GEN: Gentamycin, TOB: Tobramycin, IPM: Imipenem, CIP: Ciprofloxacin, LEV: Levofloxacin, TZP: Piperacillin-tazobactam, CTX: Cefotaxime, CRO: Ceftriaxone, SXT: Trimethoprim-sulphamethoxazole, SAM: Ampicillin-sulbactam, PB: Polymyxin B, TE: Tetracycline, DO: Doxycycline, MH: Minocycline TIC: Tigecycline.

Blue, Grey and Yellow color represent susceptible, intermediate, and resistant to antibiotics.

**Table S2. *A. baumannii* strains used in the experiment**

| Strains | Application                                  |
|---------|----------------------------------------------|
| Ab80    | Metabolomic analysis                         |
| Ab137   | Metabolomic analysis                         |
| Ab296   | Metabolomic analysis                         |
| Ab311   | Metabolomic analysis                         |
| Ab455   | Metabolomic analysis                         |
| Ab4     | Metabolomic analysis and Antibacterial assay |
| Ab61    | Metabolomic analysis and Antibacterial assay |
| Ab156   | Metabolomic analysis and Antibacterial assay |
| Ab166   | Metabolomic analysis and Antibacterial assay |
| Ab167   | Metabolomic analysis and Antibacterial assay |
| Ab269   | Metabolomic analysis and Antibacterial assay |
| Ab292   | Metabolomic analysis and Antibacterial assay |
| Ab295   | Metabolomic analysis and Antibacterial assay |
| Ab314   | Metabolomic analysis and Antibacterial assay |
| Ab323   | Metabolomic analysis and Antibacterial assay |
| Ab9     | Antibacterial assay                          |
| Ab41    | Antibacterial assay                          |
| Ab119   | Antibacterial assay                          |
| Ab148   | Antibacterial assay                          |
| Ab192   | Antibacterial assay                          |
| Ab300   | Antibacterial assay                          |
| Ab306   | Antibacterial assay                          |
| Ab322   | Antibacterial assay                          |
| Ab324   | Antibacterial assay                          |
| Ab327   | Antibacterial assay                          |

**Table S3. Primers for qPCR**

| Gene     |         | Primer sequence (5'→3') |
|----------|---------|-------------------------|
| 16S rRNA | Forward | cgccacactgggactgag      |
|          | Reverse | ccataaggccttcttcacacac  |
| A1S_3134 | Forward | ccgtgtagcgcatacttag     |
|          | Reverse | accacgagacaagttgtgt     |
| A1S_1026 | Forward | agctgtcgaagaggttatga    |
|          | Reverse | gaaagcacggtaactgag      |
| A1S_3182 | Forward | tccaaactggctaaaactca    |
|          | Reverse | acaagcaccttcacacaac     |
| A1S_3185 | Forward | tcagcctgatgagtttaagg    |
|          | Reverse | cgatcatgcaactaaactgtg   |
| A1S_2352 | Forward | ttgctgagccaacagtagtt    |
|          | Reverse | catttcactctgcaatacaa    |
| A1S_1023 | Forward | gtactcaggctcagttgatctg  |
|          | Reverse | cgccagattccatcacact     |
| A1S_0498 | Forward | tgacttctggtccagttgta    |
|          | Reverse | gaagcaactgagtcagaacc    |
| A1S_0962 | Forward | cggcgatgatgatgttga      |
|          | Reverse | ttgcgccagagttaatcatc    |
| A1S_1466 | Forward | gggggtccttgggtacactt    |
|          | Reverse | acgcgcttttgaggattca     |
